# Supplementary material for: Organism-specific training improves performance of linear B-cell epitope prediction
Source: Bioinformatics. 2021 Jul 21;37(24):4826–34. doi: 10.1093/bioinformatics/btab536 (PMC8665745; doi:10.1093/bioinformatics/btab536)
Supplement: btab536_Supplementary_Data [file btab536_supplementary_data.zip]

Archive with 6 entries (6 files):
- 00_2_Supplementary_File_1.pdf
- 00_2_Supplementary_File_2.pdf
- 00_2_Supplementary_File_3.pdf
- 00_2_Supplementary_File_4.pdf
- 00_2_Supplementary_File_5.pdf
- 00_2_Supplementary_File_6.pdf
