# Supplementary material for: Organism-specific training improves performance of linear B-cell epitope prediction
Source: Bioinformatics. 2021 Jul 21;37(24):4826–34. doi: 10.1093/bioinformatics/btab536 (PMC8665745; doi:10.1093/bioinformatics/btab536)
Supplement: btab536_Supplementary_Data [file btab536_supplementary_data.zip › 00_2_Supplementary_File_1.pdf]

## Supplementary File 1: Supplementary Tables

July 1, 2021

Table S1 - 1: Epitope prediction tools in the literature and the composition of their training data sets. PK = prokaryotes; VI = virus; FG = fungi; PR = protozoan; HM = human; OE = other eukaryotes. Details on the source databases used can be found on the works cited in the *Methods* column.

| Method                                         | Year | Training dataset         |                   |
|------------------------------------------------|------|--------------------------|-------------------|
|                                                |      | Sources                  | Composition       |
| Antigenic<br>(Kolaskar and Tongaonkar, 1990)   | 1990 | -                        | -                 |
| PREDITOP<br>(Pellequer and Westhof, 1993)      | 1993 | -                        | -                 |
| People (Alix, 1999)                            | 1999 | -                        | -                 |
| Bepitope<br>(Odorico and Pellequer, 2003)      | 2003 | -                        | -                 |
| Bcepred (Saha and Raghava, 2004)               | 2004 | -                        | -                 |
| Söllner/Mayer<br>(Söllner and Mayer, 2006)     | 2006 | BCIPEP, FIMM             | PK+VI+FG+PR+OE    |
| ABCpred (Saha and Raghava, 2006)               | 2006 | BCIPEP                   | PK+VI+FG+PR+OE    |
| Chen (Chen <i>et al.</i> , 2007)               | 2007 | BCIPEP                   | PK+VI+FG+PR+OE    |
| BCpred<br>(EL-Manzalawy <i>et al.</i> , 2008)  | 2008 | BCIPEP                   | PK+VI+FG+PR+OE    |
| FBCpred<br>(EL-Manzalawy <i>et al.</i> , 2008) | 2008 | BCIPEP                   | PK+VI+FG+PR+OE    |
| LEPD (Chang <i>et al.</i> , 2008)              | 2008 | Antijen,<br>Pellequer    | PK+VI+PR+HM+OE    |
| Epitopia (Rubinstein <i>et al.</i> , 2009)     | 2009 | BCIPEP                   | PK+VI+FG+PR+OE    |
| COBEpro<br>(Sweredoski and Baldi, 2009)        | 2009 | BCIPEP, HIV              | PK+VI+FG+PR+OE    |
| BayesB (Wee <i>et al.</i> , 2010)              | 2010 | BCIPEP                   | PK+VI+FG+PR+OE    |
| LEPS (Wang <i>et al.</i> , 2011a)              | 2011 | BCIPEP                   | PK+VI+FG+PR+OE    |
| BEOracle (Wang <i>et al.</i> , 2011b)          | 2011 | BCIPEP, IEDB,<br>Antijen | PK+VI+FG+HM+OE    |
| SVMTriP (Yao <i>et al.</i> , 2012)             | 2012 | IEDB                     | PK+VI+PR+HM+OE    |
| BEST (Gao <i>et al.</i> , 2012)                | 2012 | BCIPEP,<br>SWISS-PROT    | PK+VI+OE          |
| LBtope (Singh <i>et al.</i> , 2013)            | 2013 | IEDB                     | PK+VI+HM+PR+OE    |
| BeePro (Lin <i>et al.</i> , 2013)              | 2013 | Mix of datasets          | PK+VI+FG+PR+HM+OE |
| EPMLR (Lian <i>et al.</i> , 2014)              | 2014 | BCIPEP, IEDB,<br>Antijen | PK+VI+FG+HM+OE    |
| DMN-LBE (Lian <i>et al.</i> , 2015)            | 2015 | IEDB                     | PK+VI+HM+PR+OE    |
| LBEEP<br>(Saravanan and Gautham, 2015)         | 2015 | IEDB                     | PK+VI+HM+PR+OE    |
| APCpred (Shen <i>et al.</i> , 2015)            | 2015 | BCIPEP                   | PK+VI+FG+PR+OE    |
| Bepipred 2.0 (Jespersen <i>et al.</i> , 2017)  | 2017 | PDB                      | PK+VI+OE          |
| DRREP (Sher <i>et al.</i> , 2017)              | 2017 | BCIPEP                   | PK+VI+FG+PR+OE    |
| iBCE-EL (Manavalan <i>et al.</i> , 2018)       | 2018 | IEDB                     | PK+VI+HM+PR+OE    |
| EpiDope (Collatz <i>et al.</i> , 2020)         | 2020 | IEDB                     | PK+VI+HM+PR+OE    |

Table S1 - 2: Number of positive/negative examples in each dataset. Hold-out sets always contain only target organism proteins that were not seen during model training.

|                    |          | Orgspec | Heter. | Hybrid | Hold-out |
|--------------------|----------|---------|--------|--------|----------|
| <i>O. volvulus</i> | Positive | 2441    | 2634   | 5075   | 832      |
|                    | Negative | 2378    | 2922   | 5300   | 777      |
| Epstein-Barr       | Positive | 1746    | 1981   | 3727   | 625      |
|                    | Negative | 811     | 1864   | 2675   | 315      |
| Hep. C virus       | Positive | 919     | 1926   | 2845   | 218      |
|                    | Negative | 783     | 1975   | 2758   | 358      |

Table S1 - 3: Estimates and standard errors of performance for all models tested. Of the three test organisms used, only the Hepatitis C virus had a significant presence of hold-out observations as part of the training sets of some of the benchmark predictors (16.3% for Bepipred2, 8.6% for iBCE-EL and 9.59% for LBtope). Values in parentheses indicate the performance variation (up or down) observed when only sequences not present in the training set were used for validation. Notice the substantial drop in performance for LBtope in this case. For the other organisms this type of *leakage* was minimal and did not affect the estimates, so the full hold-out set was used for assessment and a single estimate is presented.

| Epstein-Barr Virus |             |             |              |             |             |             |
|--------------------|-------------|-------------|--------------|-------------|-------------|-------------|
|                    | ACC         | AUC         | MCC          | PPV         | NPV         | SENS        |
| RF-OrgSpec         | 0.72 ± 0.01 | 0.74 ± 0.02 | 0.32 ± 0.03  | 0.73 ± 0.02 | 0.67 ± 0.04 | 0.92 ± 0.01 |
| RF-Hybrid          | 0.45 ± 0.02 | 0.5 ± 0.02  | −0.05 ± 0.03 | 0.64 ± 0.02 | 0.32 ± 0.02 | 0.39 ± 0.02 |
| RF-Heter           | 0.35 ± 0.02 | 0.36 ± 0.02 | −0.25 ± 0.03 | 0.51 ± 0.03 | 0.24 ± 0.02 | 0.3 ± 0.02  |
| ABCpred            | 0.53 ± 0.02 | 0.49 ± 0.02 | −0.05 ± 0.03 | 0.65 ± 0.02 | 0.3 ± 0.03  | 0.63 ± 0.02 |
| Bepipred2          | 0.53 ± 0.02 | 0.42 ± 0.02 | −0.11 ± 0.03 | 0.63 ± 0.02 | 0.25 ± 0.03 | 0.7 ± 0.02  |
| iBCE-EL            | 0.4 ± 0.02  | 0.46 ± 0.02 | 0.01 ± 0.03  | 0.68 ± 0.04 | 0.34 ± 0.02 | 0.18 ± 0.02 |
| LBtope             | 0.55 ± 0.02 | 0.7 ± 0.02  | 0.19 ± 0.03  | 0.78 ± 0.02 | 0.41 ± 0.02 | 0.45 ± 0.02 |
| SVMtrip            | 0.38 ± 0.02 | 0.43 ± 0.02 | −0.09 ± 0.03 | 0.59 ± 0.03 | 0.31 ± 0.02 | 0.21 ± 0.02 |

  

| <i>O. volvulus</i> |             |             |              |             |             |             |
|--------------------|-------------|-------------|--------------|-------------|-------------|-------------|
|                    | ACC         | AUC         | MCC          | PPV         | NPV         | SENS        |
| RF-OrgSpec         | 0.75 ± 0.01 | 0.83 ± 0.01 | 0.51 ± 0.02  | 0.78 ± 0.01 | 0.73 ± 0.02 | 0.73 ± 0.02 |
| RF-Hybrid          | 0.67 ± 0.01 | 0.75 ± 0.01 | 0.34 ± 0.02  | 0.69 ± 0.02 | 0.66 ± 0.02 | 0.67 ± 0.02 |
| RF-Heter           | 0.54 ± 0.01 | 0.56 ± 0.01 | 0.06 ± 0.03  | 0.54 ± 0.02 | 0.52 ± 0.02 | 0.67 ± 0.02 |
| ABCpred            | 0.51 ± 0.01 | 0.52 ± 0.01 | 0.02 ± 0.02  | 0.53 ± 0.02 | 0.49 ± 0.02 | 0.58 ± 0.02 |
| Bepipred2          | 0.63 ± 0.01 | 0.65 ± 0.01 | 0.26 ± 0.02  | 0.61 ± 0.01 | 0.66 ± 0.02 | 0.77 ± 0.01 |
| iBCE-EL            | 0.49 ± 0.01 | 0.57 ± 0.01 | 0.02 ± 0.03  | 0.55 ± 0.04 | 0.49 ± 0.01 | 0.1 ± 0.01  |
| LBtope             | 0.58 ± 0.01 | 0.59 ± 0.01 | 0.16 ± 0.02  | 0.61 ± 0.02 | 0.55 ± 0.02 | 0.51 ± 0.02 |
| SVMtrip            | 0.49 ± 0.01 | 0.49 ± 0.01 | −0.01 ± 0.02 | 0.51 ± 0.02 | 0.48 ± 0.01 | 0.25 ± 0.01 |

  

| Hepatitis C Virus |                      |                      |                      |                      |                      |                      |
|-------------------|----------------------|----------------------|----------------------|----------------------|----------------------|----------------------|
|                   | ACC                  | AUC                  | MCC                  | PPV                  | NPV                  | SENS                 |
| RF-OrgSpec        | 0.75 ± 0.02          | 0.8 ± 0.02           | 0.47 ± 0.04          | 0.67 ± 0.03          | 0.8 ± 0.02           | 0.66 ± 0.03 (0.01 ↑) |
| RF-Hybrid         | 0.71 ± 0.02          | 0.75 ± 0.02          | 0.36 ± 0.04          | 0.63 ± 0.04          | 0.74 ± 0.02 (0.01 ↑) | 0.53 ± 0.03 (0.01 ↑) |
| RF-Heter          | 0.57 ± 0.02          | 0.55 ± 0.02          | 0.04 ± 0.04          | 0.41 ± 0.04          | 0.63 ± 0.02          | 0.28 ± 0.03          |
| ABCpred           | 0.49 ± 0.02          | 0.58 ± 0.02          | 0.03 ± 0.04          | 0.39 ± 0.03          | 0.64 ± 0.03          | 0.64 ± 0.03          |
| Bepipred2         | 0.62 ± 0.02 (0.02 ↓) | 0.64 ± 0.02 (0.04 ↓) | 0.25 ± 0.04 (0.03 ↓) | 0.5 ± 0.03 (0.01 ↑)  | 0.74 ± 0.03 (0.03 ↓) | 0.66 ± 0.03 (0.03 ↓) |
| iBCE-EL           | 0.64 ± 0.02 (0.02 ↓) | 0.64 ± 0.02          | 0.14 ± 0.04 (0.02 ↑) | 0.62 ± 0.08 (0.10 ↑) | 0.64 ± 0.02 (0.02 ↓) | 0.12 ± 0.02 (0.02 ↓) |
| LBtope            | 0.76 ± 0.02          | 0.82 ± 0.02 (0.11 ↓) | 0.49 ± 0.04 (0.27 ↓) | 0.69 ± 0.03 (0.38 ↓) | 0.8 ± 0.02 (0.08 ↑)  | 0.67 ± 0.03 (0.25 ↓) |
| SVMtrip           | 0.61 ± 0.02          | 0.54 ± 0.02 (0.01 ↓) | 0.06 ± 0.04 (0.02 ↓) | 0.45 ± 0.06 (0.03 ↓) | 0.63 ± 0.02          | 0.14 ± 0.02 (0.01 ↓) |

Table S1 - 4: Raw (uncorrected) p-values for all comparisons of organism-specific models with other predictors, shown in Figure 2. The smallest detectable p-value by the bootstrap approach used was 0.001. For the hypotheses tested in this work this level of precision was sufficient.

| Epstein-Barr Virus   |              |              |              |              |              |              |
|----------------------|--------------|--------------|--------------|--------------|--------------|--------------|
|                      | SENS         | ACC          | PPV          | NPV          | MCC          | AUC          |
| <i>vs.</i> RF-Heter  | $\leq 0.001$ |
| <i>vs.</i> RF-Hybrid | $\leq 0.001$ |
| <i>vs.</i> ABCpred   | $\leq 0.001$ |
| <i>vs.</i> Bepipred2 | $\leq 0.001$ |
| <i>vs.</i> iBCE-EL   | $\leq 0.001$ | $\leq 0.001$ | 0.036        | $\leq 0.001$ | $\leq 0.001$ | $\leq 0.001$ |
| <i>vs.</i> LBtope    | $\leq 0.001$ | $\leq 0.001$ | 0.022        | $\leq 0.001$ | 0.022        | 0.125        |
| <i>vs.</i> SVMtrip   | $\leq 0.001$ |

| <i>O. Volvulus</i>   |              |              |              |              |              |              |
|----------------------|--------------|--------------|--------------|--------------|--------------|--------------|
|                      | SENS         | ACC          | PPV          | NPV          | MCC          | AUC          |
| <i>vs.</i> RF-Heter  | $\leq 0.001$ |
| <i>vs.</i> RF-Hybrid | 0.008        | $\leq 0.001$ |
| <i>vs.</i> ABCpred   | $\leq 0.001$ |
| <i>vs.</i> Bepipred2 | 0.043        | $\leq 0.001$ |
| <i>vs.</i> iBCE-EL   | $\leq 0.001$ |
| <i>vs.</i> LBtope    | $\leq 0.001$ |
| <i>vs.</i> SVMtrip   | $\leq 0.001$ |

| Hepatitis C Virus    |              |              |              |              |              |              |
|----------------------|--------------|--------------|--------------|--------------|--------------|--------------|
|                      | SENS         | ACC          | PPV          | NPV          | MCC          | AUC          |
| <i>vs.</i> RF-Heter  | $\leq 0.001$ |
| <i>vs.</i> RF-Hybrid | $\leq 0.001$ | $\leq 0.001$ | 0.169        | $\leq 0.001$ | $\leq 0.001$ | $\leq 0.001$ |
| <i>vs.</i> ABCpred   | 0.629        | $\leq 0.001$ |
| <i>vs.</i> Bepipred2 | 1.000        | $\leq 0.001$ |
| <i>vs.</i> iBCE-EL   | $\leq 0.001$ | $\leq 0.001$ | 0.379        | $\leq 0.001$ | $\leq 0.001$ | $\leq 0.001$ |
| <i>vs.</i> LBtope    | 0.867        | 0.524        | 0.491        | 0.622        | 0.503        | 0.288        |
| <i>vs.</i> SVMtrip   | $\leq 0.001$ |

Table S1 - 5: Predicted target regions in proteins of the *O. volvulus* hold-out set with average predicted probabilities above 0.75. Column *Matches* indicate IEDB epitope IDs for which the sequence identity returned a match of over 80%. Notice that (i) only predictions for proteins in the **hold-out** set are provided here, since the objective of this paper is to demonstrate the methodology rather than to provide an in-depth investigation of *O. volvulus* epitopes; and (ii) two candidate epitopes have no match on IEDB (Matches = **N/A**), and may represent new targets for experimental investigation

| Protein    | Start | End | Length | Prob. | Sequence                                                                             | Matches                                                                                                              |
|------------|-------|-----|--------|-------|--------------------------------------------------------------------------------------|----------------------------------------------------------------------------------------------------------------------|
| A0A044UVG8 | 845   | 882 | 38     | 0.86  | ERSVSQCKTSDSRNRSSRRNSPEYDISQI<br>TEQESEKS                                            | 852235 (100%); 855900 (100%)                                                                                         |
| AAD00842.1 | 1     | 71  | 71     | 0.83  | NADEKNENYSLNIKKMDASKEIDSNNKFKN<br>PIENEQEDCLSNDEELQKDSRGVIQTDEEG<br>DKCESPKQEVN      | 851260 (100%); 856295 (100%);<br>853774 (100%); 854736 (100%);<br>854918 (93.333%)                                   |
| A0A044V9S3 | 43    | 85  | 43     | 0.81  | DVEVQLWEEDTGDPDDLNLNSTRSDEKGAFE<br>VYGEDKEVTAIEP                                     | 854970 (100%); 851810 (100%);<br>852047 (100%); 857301 (100%);<br>857276 (100%); 851449 (87.5%);<br>854446 (85.714%) |
| A0A044SS43 | 15    | 90  | 76     | 0.80  | LIIVKNADEKNENYSLNIKKMDASKEIDSN<br>NKFKNPIENEQEDCRSNDEELQKDSRGVIQ<br>TDEEGDKCESPKQEVN | 854918 (100%); 851260 (100%);<br>856295 (100%); 853774 (100%);<br>854736 (100%); 856311 (85.714%)                    |
| AAF64251.1 | 120   | 149 | 30     | 0.80  | FVHHGLSGNAIESLFNEVDKNGDGYLTSIE                                                       | 854055 (100%); 853779 (100%);<br>852831 (93.333%)                                                                    |
| A0A2K6VRB1 | 299   | 349 | 51     | 0.80  | GPPGPPGNPGQDGRQGPQGDPGKDGLPGKP<br>GIDGTTGPQGERGPSGSCDHC                              | 855140 (100%); 855121 (100%);<br>855119 (100%); 851603 (100%);<br>855456 (100%); 853564 (90%)                        |
| AAF64251.1 | 376   | 394 | 19     | 0.80  | FDILQEIDSDGDGYINNSE                                                                  | 854291 (100%); 853775 (100%);<br>851576 (100%)                                                                       |
| A0A044SAZ1 | 425   | 442 | 18     | 0.80  | AYQIEKDNPNNFNANNDLI                                                                  | 855469 (100%); 855469 (100%);<br>854673 (100%); 855208 (100%);<br>945036 (83.333%); 945545<br>(83.333%)              |
| A0A044SS43 | 875   | 901 | 27     | 0.80  | KWISSEEDSISELSDNYQSEESNSSGD                                                          | 856192 (100%)                                                                                                        |
| A0A044SAZ1 | 577   | 601 | 25     | 0.79  | IGAFSVDGAEADQKNNNHEFDLIN                                                             | 851740 (100%)                                                                                                        |

Table S1 - 5 – continued from previous page

| Protein    | Start | End  | Length | Prob. | Sequence                                                                                                                                                      | Matches                                                                                                                                           |
|------------|-------|------|--------|-------|---------------------------------------------------------------------------------------------------------------------------------------------------------------|---------------------------------------------------------------------------------------------------------------------------------------------------|
| A0A044UVG8 | 829   | 841  | 13     | 0.79  | SKSRSESLVVSQR                                                                                                                                                 | <b>N/A</b>                                                                                                                                        |
| A0A044SS43 | 945   | 970  | 26     | 0.79  | PSLTVDNDGDEEEEEDEEEIEERLKN                                                                                                                                    | 853848 (100%); 856088 (83.333%)                                                                                                                   |
| A0A044SS43 | 743   | 766  | 24     | 0.78  | KRIPISMENNQENDGFDGQKAIKM                                                                                                                                      | 853390 (100%); 854905 (100%);<br>854712 (100%)                                                                                                    |
| A0A044SS43 | 977   | 1087 | 111    | 0.78  | GRKIESSDEFEPDEEEEEVEDEEEVEDEE<br>EEENEETSTIDDEKQRQSDEEEGLEEKERK<br>IVKVENDMKDMKEITFSSTKTSFIDDDKKQ<br>TEDIDDVCPSTSNVDVKLTDET                                   | 856569 (100%); 855321 (100%);<br>852138 (100%); 856604 (100%);<br>851924 (100%)                                                                   |
| AAF64251.1 | 516   | 542  | 27     | 0.78  | SQRPHDSSKSNQDEEQSEKTEEVREQ                                                                                                                                    | 856224 (100%)                                                                                                                                     |
| A0A044SS43 | 779   | 819  | 41     | 0.77  | RLNDLNVDEMTESTDTDEYQASDSASVSDPS<br>DDTDEYLPDA                                                                                                                 | 856056 (100%)                                                                                                                                     |
| A0A044RF80 | 1485  | 1501 | 17     | 0.77  | ACPECWQTEEPNEISAG                                                                                                                                             | 854139 (100%); 851875 (100%)                                                                                                                      |
| A0A044SS43 | 636   | 659  | 24     | 0.77  | TVRDAKVENSESSEESGEDDGERK                                                                                                                                      | 851949 (100%); 854897 (100%);<br>852938 (83.333%)                                                                                                 |
| A0A044SS43 | 423   | 485  | 63     | 0.77  | QQNKKQMEIENAKQLKILDRNDDQDDSEDN<br>DENEKDENDADDFILAETSTSSDDDFMPLS<br>ELK                                                                                       | 853828 (100%); 852292 (100%);<br>853331 (100%); 854720 (100%);<br>853875 (100%); 851706 (100%)                                                    |
| A0A044UVG8 | 1     | 141  | 141    | 0.77  | MQKNDGNEMICIEENITQKNPTDELEFITE<br>EGYNIGANDNSEIAHEEPDFSEYGTLATKD<br>CGEIAVDETC LHSGIREGENFGGEKFDVIE<br>QDTKENQSSDGNSTGNVITELANQNAELS<br>QNKVEEAVHDSSETAETRSIY | 853160 (100%); 851567 (100%);<br>854638 (100%); 852144 (100%);<br>853634 (100%); 854011 (100%);<br>854765 (100%); 853789 (100%);<br>855619 (100%) |
| A0A044UVG8 | 1400  | 1458 | 59     | 0.77  | GLKQHIDDDGDIKQQKQLQNAMSNNRE<br>QLESNASNNLILELQQRIGGSNENALALL                                                                                                  | 854721 (100%); 855565 (100%)                                                                                                                      |
| A0A044UVG8 | 1059  | 1094 | 36     | 0.77  | MVNYATSESEADNITVESKSSAEQLSENY<br>NKGVS                                                                                                                        | 855021 (100%); 856367 (100%)                                                                                                                      |
| AAF64254.1 | 328   | 345  | 18     | 0.77  | ATRLGQSDFDDLENQPVV                                                                                                                                            | 854085 (100%)                                                                                                                                     |
| A0A044UVG8 | 661   | 688  | 28     | 0.77  | VGNSYESNIENEILGKHDDKDEHILVSH                                                                                                                                  | 854757 (100%); 856403 (100%)                                                                                                                      |
| A0A044TU88 | 308   | 354  | 47     | 0.76  | NKLSLQKNERDKKEIEGVEKKGESKEEKKE<br>NKEAKDYKEGDKEKEKE                                                                                                           | 852155 (100%); 851711 (100%);<br>853615 (100%)                                                                                                    |
| A0A044SS43 | 915   | 929  | 15     | 0.76  | RASSSDAEDSSHSVQ                                                                                                                                               | <b>N/A</b>                                                                                                                                        |
| A0A044QWA5 | 421   | 457  | 37     | 0.75  | NQSFELQEETTNDELIDFNSLRMIDNNADP<br>IWTTFQEV                                                                                                                    | 854962 (100%); 851542 (100%);<br>851715 (100%); 855420 (100%)                                                                                     |

**Table S1 - 5 – continued from previous page**

| <b>Protein</b> | <b>Start</b> | <b>End</b> | <b>Length</b> | <b>Prob.</b> | <b>Sequence</b>                                              | <b>Matches</b>                                                |
|----------------|--------------|------------|---------------|--------------|--------------------------------------------------------------|---------------------------------------------------------------|
| AAF64251.1     | 239          | 294        | 56            | 0.75         | MKNADKNDDGHIDKKEAQKIAFEQEGISAG<br>DVNEMIMSVDDNNDGELNAPEFADFE | 856870 (100%); 853605 (100%);<br>852659 (100%); 851234 (100%) |

## Supplementary References 1

- Alix, A. J. (1999). Predictive estimation of protein linear epitopes by using the program people. *Vaccine*, **18**(3-4), 311–314.
- Chang, H.-T., Liu, C.-H., and Pai, T.-W. (2008). Estimation and extraction of b-cell linear epitopes predicted by mathematical morphology approaches. *Journal of Molecular Recognition*, **21**(6), 431–441.
- Chen, J., Liu, H., Yang, J., and Chou, K.-C. (2007). Prediction of linear b-cell epitopes using amino acid pair antigenicity scale. *Amino acids*, **33**(3), 423–428.
- Collatz, M., Mock, F., Barth, E., Hölzer, M., Sachse, K., and Marz, M. (2020). EpiDope: a deep neural network for linear b-cell epitope prediction. *Bioinformatics*.
- EL-Manzalawy, Y., Dobbs, D., and Honavar, V. (2008). Predicting linear b-cell epitopes using string kernels. *Journal of Molecular Recognition: An Interdisciplinary Journal*, **21**(4), 243–255.
- Gao, J., Faraggi, E., Zhou, Y., Ruan, J., and Kurgan, L. (2012). Best: Improved prediction of b-cell epitopes from antigen sequences. *Plos One*, **7**(6), e40104.
- Jespersen, M. C., Peters, B., Nielsen, M., and Marcatili, P. (2017). Bepipred-2.0: improving sequence-based b-cell epitope prediction using conformational epitopes. *Nucleic acids research*, **45**(W1), W24–W29.
- Kolaskar, A. and Tongaonkar, P. C. (1990). A semi-empirical method for prediction of antigenic determinants on protein antigens. *FEBS letters*, **276**(1-2), 172–174.
- Lian, Y., Ge, M., and Pan, X.-M. (2014). EPMLR: sequence-based linear b-cell epitope prediction method using multiple linear regression. *BMC Bioinformatics*, **15**(1).
- Lian, Y., Huang, Z.-C., Ge, M., and Pan, X.-M. (2015). An improved method for predicting linear b-cell epitope using deep maxout networks. *Biomedical and Environmental Sciences*, **28**(6), 460–463.
- Lin, S. Y.-H., Cheng, C.-W., and Su, E. C.-Y. (2013). Prediction of b-cell epitopes using evolutionary information and propensity scales. In *BMC bioinformatics*, volume 14, page S10. Springer.
- Manavalan, B., Govindaraj, R. G., Shin, T. H., Kim, M. O., and Lee, G. (2018). iBCE-EL: A new ensemble learning framework for improved linear b-cell epitope prediction. *Frontiers in Immunology*, **9**.
- Odorico, M. and Pellequer, J.-L. (2003). Bepitope: predicting the location of continuous epitopes and patterns in proteins. *Journal of Molecular Recognition*, **16**(1), 20–22.
- Pellequer, J. and Westhof, E. (1993). Preditop: a program for antigenicity prediction. *Journal of molecular graphics*, **11**(3), 204–210.
- Rubinstein, N. D., Mayrose, I., and Pupko, T. (2009). A machine-learning approach for predicting b-cell epitopes. *Molecular Immunology*, **46**(5), 840–847.
- Saha, S. and Raghava, G. P. S. (2004). Bcepred: prediction of continuous b-cell epitopes in antigenic sequences using physico-chemical properties. In *International Conference on Artificial Immune Systems*, pages 197–204. Springer.
- Saha, S. and Raghava, G. P. S. (2006). Prediction of continuous b-cell epitopes in an antigen using recurrent neural network. *Proteins: Structure, Function, and Bioinformatics*, **65**(1), 40–48.
- Saravanan, V. and Gautham, N. (2015). Harnessing computational biology for exact linear b-cell epitope prediction: a novel amino acid composition-based feature descriptor. *Omics: a journal of integrative biology*, **19**(10), 648–658.

- Shen, W., Cao, Y., Cha, L., Zhang, X., Ying, X., Zhang, W., Ge, K., Li, W., and Zhong, L. (2015). Predicting linear b-cell epitopes using amino acid anchoring pair composition. *BioData mining*, **8**(1), 1–12.
- Sher, G., Zhi, D., and Zhang, S. (2017). DRREP: deep ridge regressed epitope predictor. *BMC Genomics*, **18**(S6).
- Singh, H., Ansari, H. R., and Raghava, G. P. (2013). Improved method for linear b-cell epitope prediction using antigen’s primary sequence. *PloS one*, **8**(5).
- Söllner, J. and Mayer, B. (2006). Machine learning approaches for prediction of linear b-cell epitopes on proteins. *Journal of Molecular Recognition: An Interdisciplinary Journal*, **19**(3), 200–208.
- Sweredoski, M. J. and Baldi, P. (2009). Cobepro: a novel system for predicting continuous b-cell epitopes. *Protein Engineering, Design & Selection*, **22**(3), 113–120.
- Wang, H.-W., Lin, Y.-C., Pai, T.-W., and Chang, H.-T. (2011a). Prediction of b-cell linear epitopes with a combination of support vector machine classification and amino acid propensity identification. *Journal of Biomedicine and Biotechnology*, **2011**, 1–12.
- Wang, Y., Wu, W., Negre, N. N., White, K. P., Cheng, L., and Shah, P. K. (2011b). Determinants of antigenicity and specificity in immune response for protein sequences. *BMC Bioinformatics*, **12**, 251.
- Wee, L. J., Simarmata, D., Kam, Y.-W., Ng, L. F., and Tong, J. C. (2010). Svm-based prediction of linear b-cell epitopes using bayes feature extraction. In *BMC genomics*, volume 11, page S21. Springer.
- Yao, B., Zhang, L., Liang, S., and Zhang, C. (2012). Svmtrip: a method to predict antigenic epitopes using support vector machine to integrate tri-peptide similarity and propensity. *PloS one*, **7**(9), e45152.
